### Cardiac sympathetic denervation in wild-type transthyretin amyloidosis

A. Aimo<sup>1</sup>, A. Gimelli<sup>2</sup>, G. Vergaro<sup>2</sup>, D. Genovesi<sup>2</sup>, A. Kusch<sup>2</sup>, M. Emdin<sup>2</sup>, P. Marzullo<sup>2</sup>

<sup>1</sup>Scuola Superiore Sant'Anna, Pisa, Italy; <sup>2</sup>Fondazione Toscana Gabriele Monasterio, Pisa, Italy

**Funding Acknowledgement:** Type of funding source: None

**Background:** Tissue accumulation of misfolded transthyretin (TTR) may occur because of TTR gene mutations (variant amyloid TTR amyloidosis, ATTRv), or as an age-related phenomenon (wild-type ATTR, ATTRwt). Cardiac sympathetic denervation has been reported in ATTRv, but has never been investigated in ATTRwt.

**Methods:** Fifteen consecutive patients with ATTRwt cardiomyopathy (81% men, median age 82 years, no one with prior myocardial infarction) underwent Cadmium Zinc Telluride tomographic imaging for amyloid burden (99mTc-hydroxymethylene diphosphonate - 99mTc-HMDP), innervation (123I-metaiodobenzylguanidine - 123I-MIBG), and perfusion (99mTc-tetrofosmin).

**Results:** Median summed 99mTc-HMDP score was 60 (58–62), denoting a severe and diffuse amyloid burden. Planar 123I-MIBG examination showed decreased early and late H/M ratios (late H/M ratio: 1.5 [1.3–1.6], range 1.2–1.9, reference value  $\geq 2.0$ ). Summed 123I-MIBG score was 12

(6–22), with the most prominent denervation in the infero-septal, inferior, and infero-lateral regions; summed rest score was 7 (5–11), with lowest degrees of myocardial perfusion in the inferior and infero-septal regions. The correlation between amyloid burden (as relative 99mTc-HMDP uptake) and innervation (as relative 123I-MIBG uptake) did not achieve statistical significance at both segmental ( $p=0.252$ ) and regional level ( $p=0.251$ ). Nevertheless, denervation tended to worsen in parallel with the amyloid burden, and 123I-MIBG scores increased with 99mTc-HMDP scores. Segments and regions with more prominent hypoperfusion were those showing the more intense denervation ( $r=0.500$  and  $0.591$ , respectively; both  $p<0.001$ ).

**Conclusions:** Patients with ATTRwt cardiomyopathy display cardiac sympathetic denervation, particularly in the inferior and septal myocardial wall. Myocardial hypoperfusion has a similar regional pattern, while the amyloid burden is more extensive.

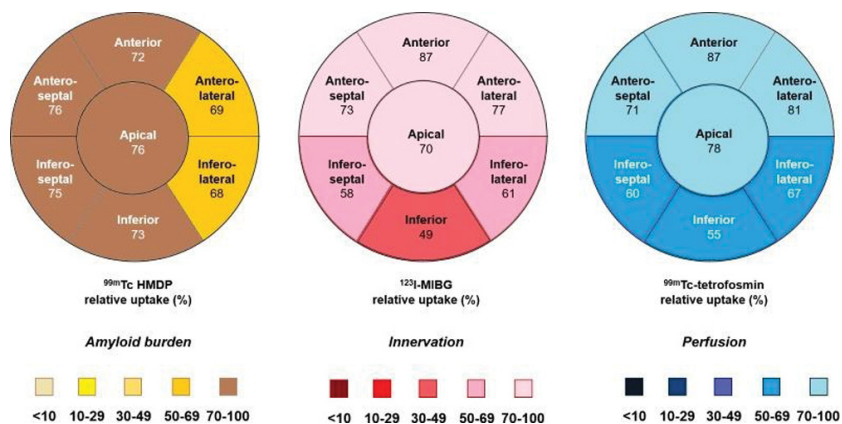

Downloaded from https://academic.oup.com/eurheartj/article/41/Supplement\_2/ehaa946.2043/6003511 by guest on 25 April 2024
